# Supplementary material
Source: publisher site journal article supplement (https://www.dovepress.com/article/352859)

**Supplementary Table 1.** Proportional hazard assumption tests of the Cox regression model of each included dataset

|             |         |    |      |
|-------------|---------|----|------|
| GSE21257    | chisq   | df | p    |
| Age         | 0.0328  | 1  | 0.86 |
| Gender      | 0.2202  | 1  | 0.64 |
| Huvos Grade | 0.736   | 1  | 0.39 |
| Metastasis  | 1.7491  | 1  | 0.19 |
| Risk group  | 1.773   | 1  | 0.18 |
| GLOBAL      | 4.312   | 5  | 0.51 |
|             |         |    |      |
| GSE39055    | chisq   | df | p    |
| Age         | 0.54367 | 1  | 0.46 |
| Gender      | 0.22838 | 1  | 0.63 |
| Huvos Grade | 0.18199 | 1  | 0.67 |
| Risk group  | 0.00424 | 1  | 0.95 |
| GLOBAL      | 1.25897 | 4  | 0.87 |
|             |         |    |      |
| GSE16091    | chisq   | df | p    |
| Age         | 0.0796  | 1  | 0.78 |
| Gender      | 0.6509  | 2  | 0.72 |
| Metastasis  | 0.0644  | 1  | 0.8  |
| Risk group  | 0.0127  | 1  | 0.91 |
| GLOBAL      | 1.4391  | 5  | 0.92 |

**Supplementary Figure 1. GSEA of the (A) GSE39055 and (B) GSE21257 dataset.**

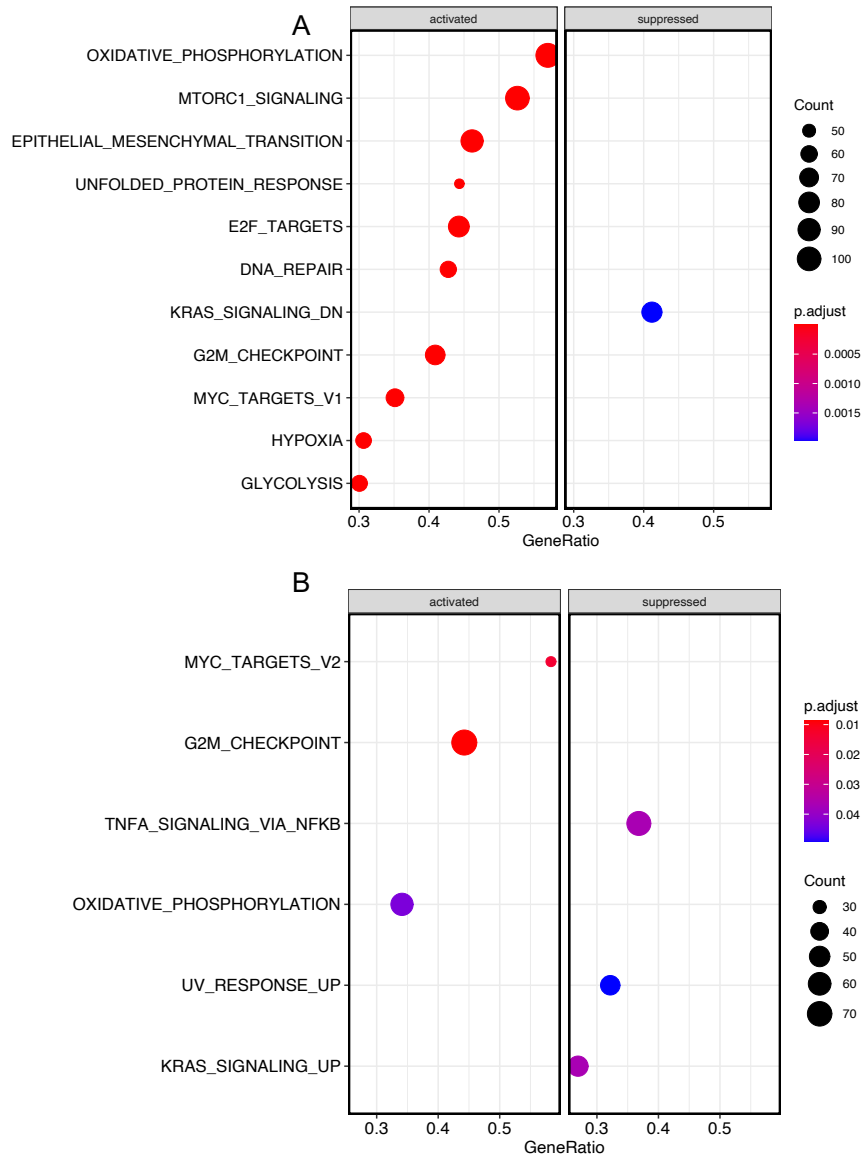

**Supplementary Figure 2.** Immune infiltration analysis. Correlation analysis of the immune cell proportion and the risk score of patients in the (A-F) GSE21257 dataset and (G-L) GSE16091 dataset.

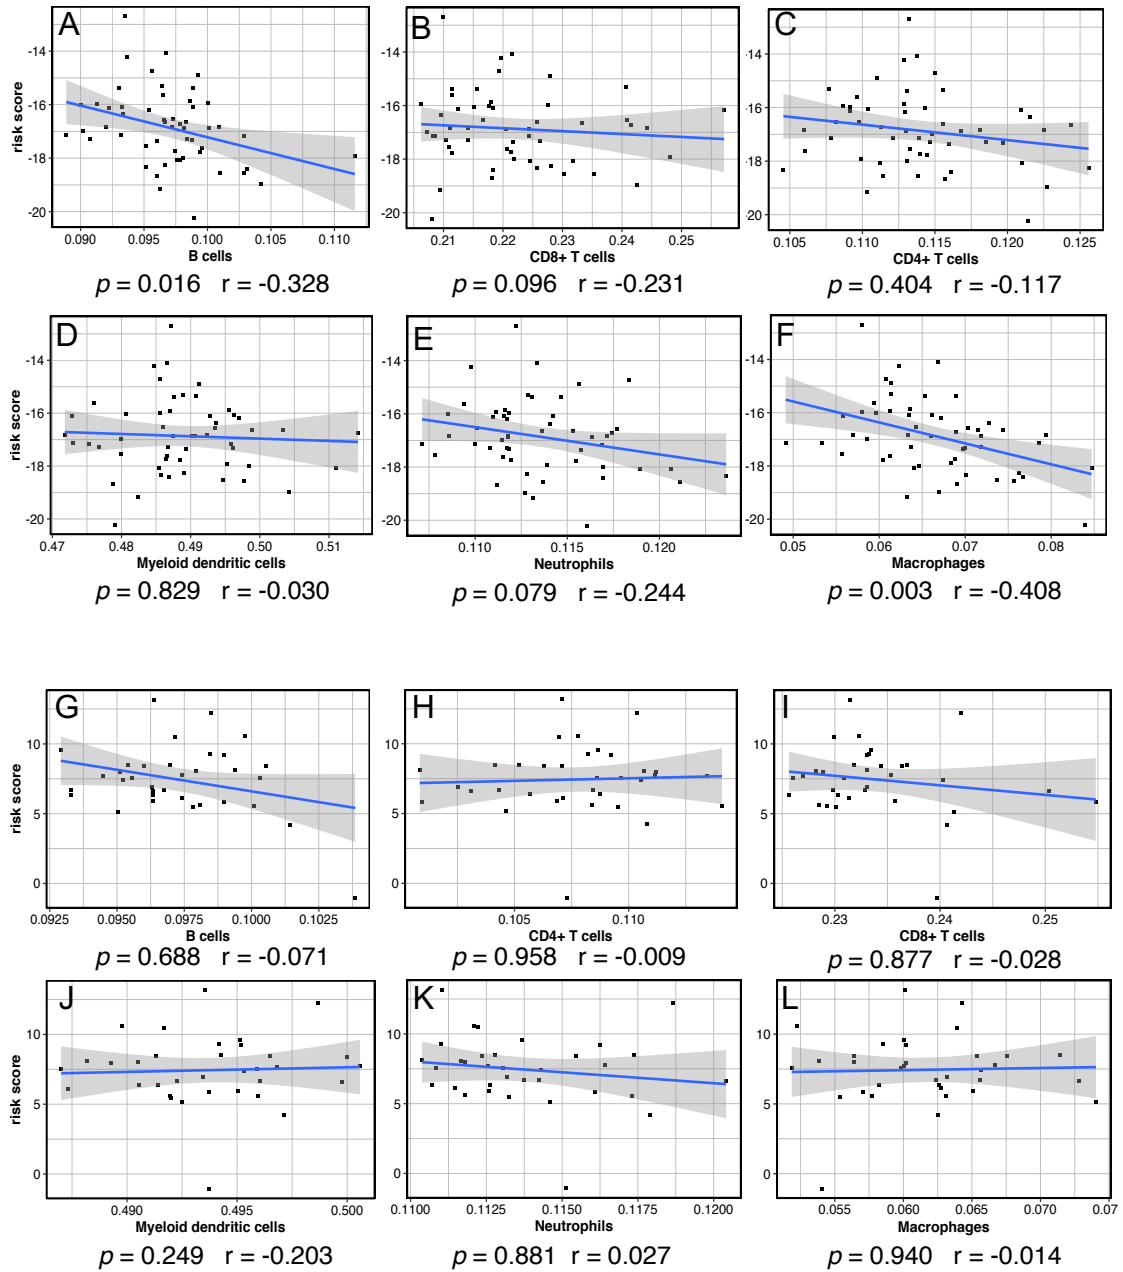

Supplement: Supplementary file 1 [file get_supplementary_file.php]
